# Supplementary material for: A comprehensive evaluation of clinicopathologic characteristics, molecular features and prognosis in lung adenocarcinoma with solid component
Source: Springer Nature journal article supplement (doi:10.1007/s00432-018-2588-6), 2018-01-23
Supplement: MOESM1 [file 15412138]

**Supplementary material**

**Patients and methods**

**Mutational analysis**

PCR primers were listed in the following table:

| Primers | Sequence |
| --- | --- |
| *EGFR* exon 18-22-Forward | 5’-TGAAGGCTGTCCAACGAATG-3’ |
| *EGFR* exon 18-22-Reverse | 5’-AGGCGTTCTCCTTTCTCCAG-3’ |
| *KRAS* exon 2-3-Forward | 5’-AGGCCTGCTGAAAATGACTG-3’ |
| *KRAS* exon 2-3-Reverse | 5’-TGGTGAATATCTTCAAATGATTTAGT-3’ |
| *HER2* exon 18-21-Forward | 5’-CCCTCTGACGTCCATCATCT-3’ |
| *HER2* exon 18-21-Reverse | 5’-GCAGGGTCTGGACTGAAGAA-3’ |
| *BRAF* exon 11-15-Forward | 5’-TCAGAAGACAGGAATCGAATGA-3’ |
| *BRAF* exon 11-15-Reverse | 5’-GATGACTTCTGGTGCCATCC-3’ |
| *EML4*-*ALK* exon 2-Forward | 5’-TGATGTTTTGAGGCGTCTTG-3’ |
| *EML4*-*ALK* exon 2-Reverse | 5’-TGCCAGCAAAGCAGTAGTTG-3’ |
| *EML4*-*ALK* exon 13-Forward | 5’-AGATCGCCTGTCAGCTCTTG-3’ |
| *EML4*-*ALK* exon 13-Reverse | 5’-TGCCAGCAAAGCAGTAGTTG-3’ |
| *EML4*-*ALK* exon 18-Forward | 5’-TTAGCATTCTTGGGGAATGG-3’ |
| *EML4*-*ALK* exon 18-Reverse | 5’-TGCCAGCAAAGCAGTAGTTG-3’ |
| *KIF5B*-*RET* exon 15-Forward | 5’-TAAGGAAATGACCAACCACCAG-3’ |
| *KIF5B*-*RET* exon 15-Reverse | 5’-CCTTGACCACTTTTCCAAATTC-3’ |
| *CCDC6*-*RET* exon 15-Forward | 5’-GCTGGAGACCTACAAACTGA-3’ |
| *CCDC6*-*RET* exon 15-Reverse | 5’-CCTTGACCACTTTTCCAAATTC-3’ |
| *ROS1* exon 13-14-Forward | 5’-AACATAAGTGGAACCATGCTG-3’ |
| *ROS1* exon 13-14-Reverse | 5’-GCCATGATAAATGGTGGTTCA-3’ |
| *ROS1* exon 14-15-Forward | 5’-AAGAAGATGGGCTTTGGAGTA-3’ |
| *ROS1* exon 14-15-Reverse | 5’-TGAGATATCCGTCCCATTCAG-3’ |
| *ROS1* exon 15-16-Forward | 5’-CTACTGGGCTGGAAAGACATA-3’ |
| *ROS1* exon 15-16-Reverse | 5’-TAGAGTGTGGTCCAGTAGAGA-3’ |
| *ROS1* exon 16-17-Forward | 5’-GAATGACATGGTGGTGGATTC-3’ |
| *ROS1* exon 16-17-Reverse | 5’-CCCATCACTGAGGTCTAAAGT-3’ |
| *ROS1* exon 17-18-Forward | 5’-GTTGGTTCAAGACAGTCAATG-3’ |
| *ROS1* exon 17-18-Reverse | 5’-TCCTAAAGCCATTGATCCAGA-3’ |
| *ROS1* exon 37-38-Forward | 5’-CCACAGACCAGGAGAAGATT-3’ |
| *ROS1* exon 37-38-Reverse | 5’-GGGCTTTACGCAAATAAGTAAG-3’ |
| *ROS1* exon 38-39-Forward | 5’-GCTGAATGAACCCCAATACAT-3’ |
| *ROS1* exon 38-39-Reverse | 5’-CAAGTAGACACAGCCTTTTGA-3’ |
| *ROS1* exon 39-40-Forward | 5’-CACCTTGGTTGACCTTGTAGA-3’ |
| *ROS1* exon 39-40-Reverse | 5’-CCAAAGTCTCCAATCTTCACT-3’ |
| *ROS1* exon 40-41-Forward | 5’-GATGGCTCCAGAAAGTTTGAT-3’ |
| *ROS1* exon 40-41-Reverse | 5’-CCTCCTGTTTGCACATAGTTT-3’ |
| *ROS1* exon 41-42-Forward | 5’-AACTCTTGGTCATCAGCCTTA-3’ |
| *ROS1* exon 41-42-Reverse | 5’-TCTTTGGTCGGGTTCTTGAG-3’ |
| *ROS1* exon 42-43-Forward | 5’-AGAATTCAGGACCAACTTCAG-3’ |
| *ROS1* exon 42-43-Reverse | 5’-AGCAACTGGCATAATGTCATC-3’ |
| *ERLIN2*-*FGFR1*-Forward | 5’-CACAAGATAGAAGAGGGACAT-3’ |
| *ERLIN2*-*FGFR1*-Reverse | 5’-CTTCGGGAAGCTCATACTCAG-3’ |
| *BAG4*-*FGFR1*-Forward | 5’-ACCTCCACCCTTATATCCTCT-3’ |
| *BAG4*-*FGFR1*-Reverse | 5’-CTTCGGGAAGCTCATACTCAG-3’ |
| *FGFR1*-*TACC1*-Forward | 5’-GTGTGCCTGTGGAGGAACTT-3’ |
| *FGFR1*-*TACC1*-Reverse | 5’-GAGCTGCACTCTCAGCCTTT-3’ |
| *FGFR1*-*FGFR1*-Forward | 5’-GACATTCACCACATCGACTAC-3’ |
| *FGFR1*-*FGFR1*-Reverse | 5’-TACTCCTGGTTGGAGGTCAA-3’ |
| *FGFR2*-*CIT*-Forward | 5’-TCCTTCGGGGTGTTAATGTG-3’ |
| *FGFR2*-*CIT*-Reverse | 5’-CGGAGATGGTCCACTTCACT-3’ |
| *FGFR2*-*CCDC6*-Forward | 5’-TCCTTCGGGGTGTTAATGTG-3’ |
| *FGFR2*-*CCDC6*-Reverse | 5’-TGTGACGTTCCTCCTCCAGAT-3’ |
| *FGFR2*-*BICC1*-Forward | 5’-TCCTTCGGGGTGTTAATGTG-3’ |
| *FGFR2*-*BICC1*-Reverse | 5’-ATGGCAGTTCCTTCCTTCACA-3’ |
| *FGFR2*-*CASP7*-Forward | 5’-TCCTTCGGGGTGTTAATGTG -3’ |
| *FGFR2*-*CASP7*-Reverse | 5’-CTCGGCATCTTTGTCTGTTCC-3’ |
| *FGFR2*-*KIAA1967*-Forward | 5’-TCCTTCGGGGTGTTAATGTG-3’ |
| *FGFR2*-*KIAA1967*-Reverse | 5’-CATGCCTTGGCTTCTTAGCAC-3’ |
| *FGFR2*-*AFF3*-Forward | 5’-TCCTTCGGGGTGTTAATGTG-3’ |
| *FGFR2*-*AFF3*-Reverse | 5’-CACAGTCCTGGACGTCCTCTT-3’ |
| *FGFR2*-*OFD1*-Forward | 5’-TCCTTCGGGGTGTTAATGTG-3’ |
| *FGFR2*-*OFD1*-Reverse | 5’-TGCCCGAAGTTGCTCTTCTAT-3’ |
| *SLC45A3*-*FGFR2*-Forward | 5’-GGGCGGAACCAGCCTGCAC-3’ |
| *SLC45A3*-*FGFR2*-Reverse | 5’-ACCATCGGTGTCATCCTCATC-3’ |
| *FGFR3*-*BAIAP2L1*-Forward | 5’-AACTGCACACACGACCTGTA-3’ |
| *FGFR3*-*BAIAP2L1*-Forward | 5’-CTTCCTTGGCTTTTCCTTCTGA-3’ |
| *FGFR3*-*TACC3*-Forward | 5’-AACTGCACACACGACCTGTA-3’ |
| *FGFR3*-*TACC3*-Forward | 5’-GAAAGTTCCTTCTGCTTCTGA-3’ |
| *P110* exon 9-Forward | 5’-TTCAGCAGTGTGGTAAAGTTCC-3’ |
| *P110* exon 9-Reverse | 5’-TACCAAGCAATACATCTGGGCTAC-3’ |
| *P110* exon 20-Forward | 5’-ATGGTGAAAGACGATGGACAACTG-3’ |
| *P110* exon 20-Reverse | 5’-TTCATGGATTGTGCAATTCCTATGC-3’ |

**Supplementary Table 1** Independent predictors for DFS and OS in stage I patients

|  |  | **DFS** | | **OS** | |
| --- | --- | --- | --- | --- | --- |
| **Variable** | **Category** | **HR (95% CI)** | ***p*** | **HR (95% CI)** | ***p*** |
| Smoking | Ever/Never | 2.284 (1.745-3.211) | 0.018 | 2.538 (1.856-3.637) | 0.011 |
| PI | Invasion/No | 1.135 (0.816-1.527) | 0.177 | 1.384 (0.949-2.018) | 0.091 |
| KRAS | Mutation/No | 2.161 (0.985-4.743) | 0.055 | 2.404 (1.043-5.555) | 0.038 |
| Solid | Positive/Negative | 1.826 (0.94-4.089) | 0.078 | 2.074 (1.052-4.286) | 0.043 |

**Supplementary Table 2** Independent predictors for DFS and OS in stage II patients

|  |  | **DFS** | | **OS** | |
| --- | --- | --- | --- | --- | --- |
| **Variable** | **Category** | **HR (95% CI)** | ***p*** | **HR (95% CI)** | ***p*** |
| Smoking | Ever/Never | 1.645 (1.148-3.918) | 0.036 | 1.896 (1.202-4.07) | 0.028 |
| PI | Invasion/No | 1.61 (0.848-3.701) | 0.154 | 1.985 (1.095-3.221) | 0.045 |
| KRAS | Mutation/No | 1.861 (0.959-4.912) | 0.093 | 2.093 (1.112-5.028) | 0.044 |
| Solid | Positive/Negative | 1.923 (1.184-4.046) | 0.042 | 2.103 (1.28-3.541) | 0.036 |

**Supplementary Table 3** Independent predictors for DFS and OS in stage III patients

|  |  | **DFS** | | **OS** | |
| --- | --- | --- | --- | --- | --- |
| **Variable** | **Category** | **HR (95% CI)** | ***p*** | **HR (95% CI)** | ***p*** |
| Smoking | Ever/Never | 1.568 (0.758-3.799) | 0.182 | 1.89  (0.865-4.869) | 0.076 |
| PI | Invasion/No | 1.816 (1.063-3.885) | 0.017 | 2.265 (1.114-4.488) | 0.013 |
| KRAS | Mutation/No | 1.985 (0.5-6.387) | 0.192 | 2.463 (0.91-7.163) | 0.056 |
| Solid | Positive/Negative | 1.926 (0.862-6.096) | 0.095 | 2.241 (0.927-5.51) | 0.082 |

**Supplementary Table 4** Independent predictors for DFS and OS in stage I non-solid predominant lung adenocarcinomas

|  |  | **DFS** | | **OS** | |
| --- | --- | --- | --- | --- | --- |
| **Variable** | **Category** | **HR (95% CI)** | ***p*** | **HR (95% CI)** | ***p*** |
| Smoking | Ever/Never | 1.859 (1.274-2.818) | 0.027 | 2.079 (1.445-3.085) | 0.019 |
| PI | Invasion/No | 1.079 (0.514-2.866) | 0.737 | 1.891 (0.509-7.024) | 0.342 |
| KRAS | Mutation/No | 1.51 (0.539-4.201) | 0.22 | 1.922 (0.837-5.042) | 0.143 |
| Solid | Minor/Negative | 1.324 (0.479-3.77) | 0.306 | 1.721 (0.931-4.043) | 0.086 |

**Supplementary Table 5** Independent predictors for DFS and OS in stage II non-solid predominant lung adenocarcinomas

|  |  | **DFS** | | **OS** | |
| --- | --- | --- | --- | --- | --- |
| **Variable** | **Category** | **HR (95% CI)** | ***p*** | **HR (95% CI)** | ***p*** |
| Smoking | Ever/Never | 1.109 (0.816-2.405) | 0.082 | 1.347 (0.907-2.258) | 0.065 |
| PI | Invasion/No | 1.463 (0.519-4.927) | 0.286 | 1.731 (0.873-4.682) | 0.108 |
| KRAS | Mutation/No | 1.359 (0.519-4.13) | 0.374 | 1.832 (0.583-4.463) | 0.212 |
| Solid | Minor/Negative | 1.127 (0.504-4.249) | 0.292 | 1.303 (0.72-3.697) | 0.194 |

**Supplementary Table 6** Independent predictors for DFS and OS in stage III non-solid predominant lung adenocarcinomas

|  |  | **DFS** | | **OS** | |
| --- | --- | --- | --- | --- | --- |
| **Variable** | **Category** | **HR (95% CI)** | ***p*** | **HR (95% CI)** | ***p*** |
| Smoking | Ever/Never | 1.267 (0.579-3.754) | 0.7 | 1.39  (0.689-3.58) | 0.46 |
| PI | Invasion/No | 2.34 (0.991-5.735) | 0.054 | 2.713 (1.041-5.325) | 0.035 |
| KRAS | Mutation/No | 1.212 (0.651-5.756) | 0.745 | 1.354 (0.567-7.287) | 0.451 |
| Solid | Minor/Negative | 1.277 (0.442-7.1319) | 0.481 | 1.353 (0.422-7.324) | 0.327 |
